# Supplementary material
Source: publisher site journal article supplement (https://www.dovepress.com/article/518418)
Supplement: Supplementary file 1 [file Supplementary_Materials_1.docx]

**Supplementary Table 1. The result of TACE on RFS and OS in subgroup analyses by different TNM stages**

|  | OS | | | RFS | | |
| --- | --- | --- | --- | --- | --- | --- |
| TNM stage | HR | 95% CI | P-value | HR | 95% CI | P-value |
| I | 1.22 | 0.67-2.23 | 0.5200 | 1.44 | 0.85-2.44 | 0.1720 |
| II | 0.78 | 0.42-1.43 | 0.4192 | 1.09 | 0.58-2.03 | 0.7905 |
| III | 0.78 | 0.40-1.49 | 0.4468 | 2.65 | 1.46-4.82 | 0.0014 |
| IV | 0.56 | 0.19-1.67 | 0.2959 | 5.77 | 1.69-19.69 | 0.0051 |

Cox proportional hazards model with the TACE treatment group (yes vs. no) as the primary exposure and adjusted for the significant covariates obtained after model selection.

**Supplementary Table 2. The result of TACE on RFS and OS in subgroup analyses by different TNM stages**

|  | OS | | | RFS | | |
| --- | --- | --- | --- | --- | --- | --- |
| TNM stage | HR | 95% CI | P-value | HR | 95% CI | P-value |
| Early Stage (  I & II) | 0.97 | 0.63-1.49 | 0.8779 | 1.27 | 0.85-1.91 | 0.2404 |
| Advanced stage (III & IV) | 0.75 | 0.44-1.30 | 0.3122 | 3.06 | 1.78-5.26 | <0.0001 |

Cox proportional hazards model with the TACE treatment group (yes vs. no) as the primary exposure and adjusted for the significant covariates obtained after model selection.

**Supplementary Figure 1. Forest plot of recurrence-free survival (RFS) hazard ratios stratified by TNM stage.**


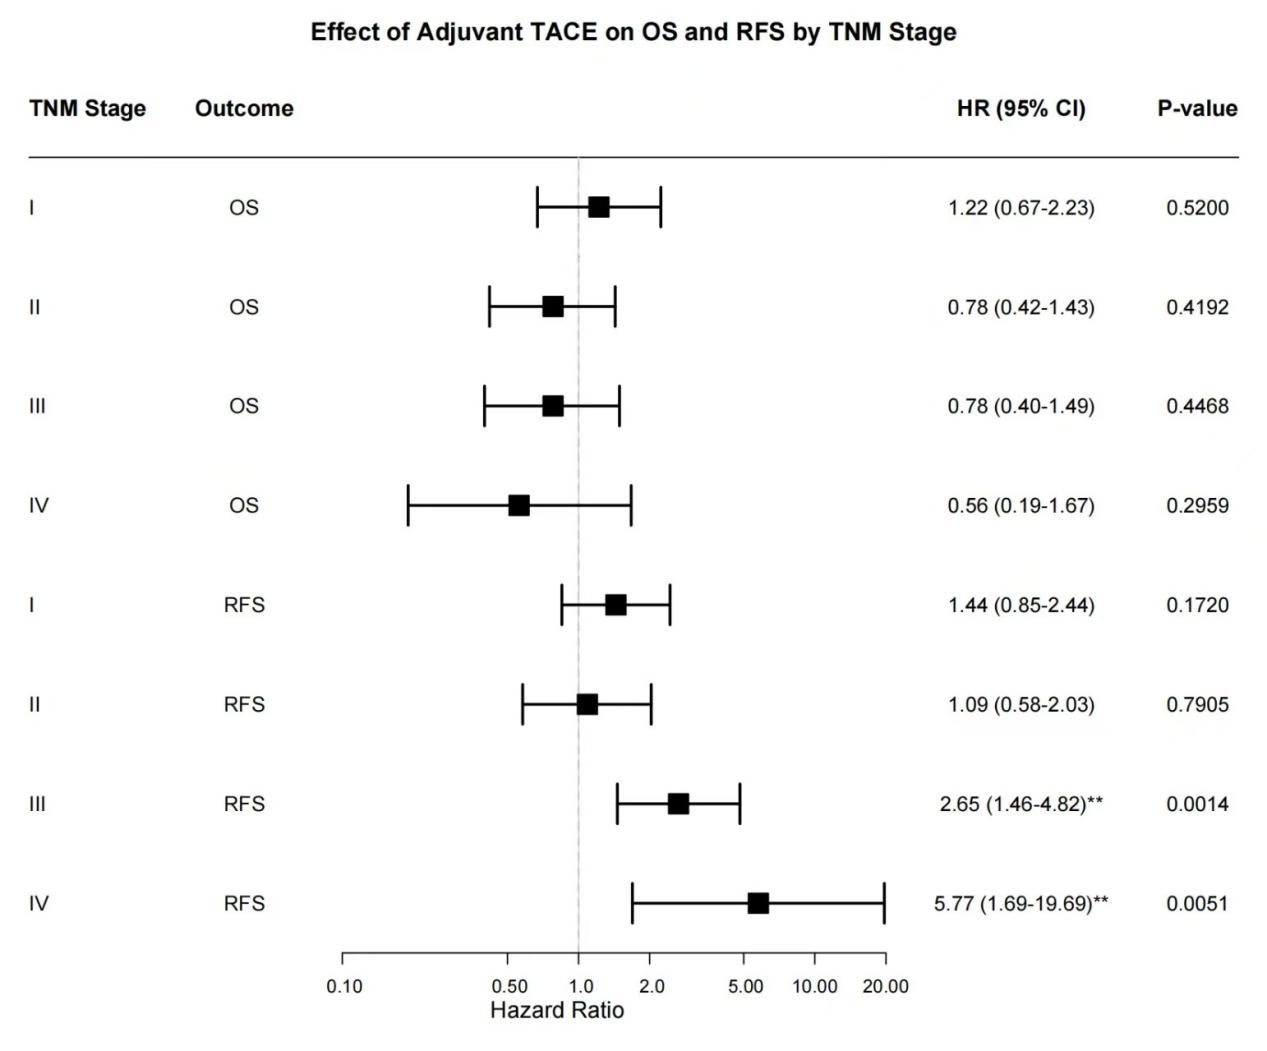


**Notes**: Cox proportional hazards models showing adjusted hazard ratios (HR) and 95% confidence intervals (CI) for recurrence risk. The vertical line (HR=1) indicates no effect.

Key findings:

Stage I: HR=1.44 (95% CI: 0.85–2.44, P=0.172)

Stage II: HR=1.09 (95% CI: 0.58–2.03, P=0.791)

Stage III: HR=2.65 (95% CI: 1.46–4.82, P=0.001)

Stage IV: HR=5.77 (95% CI: 1.69–19.69, P=0.005)

Heterogeneity test: I²=67%, P=0.02 (indicating significant variation across stages).

Caution: Stage IV subgroup included only 4 TACE-treated patients; results require validation in larger cohorts.
